# Supplementary material
Source: ML conference proceedings conference paper supplement (https://openreview.net/forum?id=dqyK5RKMaW4)
Supplement: supplementary_material [file attachment]

## A APPENDIX

### A.1 PARAMETERS AND CONSTRAINTS

| Type          | Index | Hardware Parameters              | Valid Range                 | Meaning                                                                                                                                                                                                       |
|---------------|-------|----------------------------------|-----------------------------|---------------------------------------------------------------------------------------------------------------------------------------------------------------------------------------------------------------|
| PE            | H1    | PE mesh-X                        | Factors of # PEs            | Decide the arrangement of the 2-D PE array.                                                                                                                                                                   |
|               | H2    | PE mesh-Y                        | Factors of # PEs            |                                                                                                                                                                                                               |
| Local buffer  | H3    | Input entries in Local buffer    | 0 to # local buffer entries | Decide the partition of local buffer. The partition leads to sub-buffers with inflexible sizes. This is useful as the latency to access each smaller sub-buffer decreases.                                    |
|               | H4    | weights entries in Local buffer  | 0 to # local buffer entries |                                                                                                                                                                                                               |
|               | H5    | outputs entries in Local buffer  | 0 to # local buffer entries |                                                                                                                                                                                                               |
| Global buffer | H6    | Global buffer instances          | Factors of #PEs             | Determine the arrangement of global buffer, and its connection between global buffer and per PE's local buffer (Local buffer of PEs along the X-axis shares the instances of global buffer along the X-axis). |
|               | H7    | Global buffer mesh-X             | Factors of PE-mesh-X        |                                                                                                                                                                                                               |
|               | H8    | Global buffer mesh-Y             | Factors of PE-mesh-Y        |                                                                                                                                                                                                               |
|               | H9    | Global buffer block size         | Factors of 16               | Determines the width of a global buffer entry                                                                                                                                                                 |
|               | H10   | Global buffer cluster size       | Factors of 16               | Determines of the number of wider structures where multiple entries are ganged into                                                                                                                           |
| Dataflow      | H11   | Dataflow option of filter width  | 1, 2                        | Options that determine the size of filter width in PE's local buffer                                                                                                                                          |
|               | H12   | Dataflow option of filter height | 1, 2                        | Options that determine the size of filter height in PE's local buffer                                                                                                                                         |

Figure 6: Hardware parameters.

| Type                                   | Hardware Constraints                                                                                                               |
|----------------------------------------|------------------------------------------------------------------------------------------------------------------------------------|
| PE                                     | PE mesh-X (H1) * PE mesh-Y (H2) = # PEs                                                                                            |
| Local buffer                           | The sum of local sub-buffers (H3, H4, H5) does not exceed buffer size                                                              |
| Global buffer                          | Global buffer mesh-X (H7) * global buffer mesh-Y (H8) = # Global buffer instances (9)                                              |
| Local buffer & global buffer (unknown) | A valid software mapping exists depending mainly on local buffer partition (H3, H4, H5) and global buffer arrangement (H6, H7, H8) |

Figure 7: Hardware constraints.

| Type                                    | Index | Software Parameters         | Valid Range                   | Meaning                                                                                                                                                      |
|-----------------------------------------|-------|-----------------------------|-------------------------------|--------------------------------------------------------------------------------------------------------------------------------------------------------------|
| Loop blocking and degree of parallelism | S1    | Blocking factors of R       | Factors of R                  | Determines the size (parallelism) of each type of data (inputs, weights and outputs) in each storage layer (except those that are in the hardware dataflow). |
|                                         | S2    | Blocking factors of S       | Factors of S                  |                                                                                                                                                              |
|                                         | S3    | Blocking factors of P       | Factors of P                  |                                                                                                                                                              |
|                                         | S4    | Blocking factors of Q       | Factors of Q                  |                                                                                                                                                              |
|                                         | S5    | Blocking factors of C       | Factors of C                  |                                                                                                                                                              |
|                                         | S6    | Blocking factors of K       | Factors of K                  |                                                                                                                                                              |
| Loop reorder                            | S7    | Loop order in local buffer  | Permutations of non-1 factors | Affects the reuse of each type of data (inputs, weights and outputs) in each storage layer.                                                                  |
|                                         | S8    | Loop order in global buffer | Permutations of non-1 factors |                                                                                                                                                              |
|                                         | S9    | Loop order in DRAM          | Permutations of non-1 factors |                                                                                                                                                              |

Figure 8: Software parameters.

## B HYPERPARAMTERS FOR BO

In Figure 10 we report the hyperparamters for BO.

| Type                                    | Software Constraints                                                                       |
|-----------------------------------------|--------------------------------------------------------------------------------------------|
| Loop blocking and degree of parallelism | Product of all blocking factors of R (S1) equals R of the target neural layer              |
|                                         | Product of all blocking factors of S (S2) equals S of the target neural layer              |
|                                         | Product of all blocking factors of P (S3) equals P of the target neural layer              |
|                                         | Product of all blocking factors of Q (S4) equals Q of the target neural layer              |
|                                         | Product of all blocking factors of C (S5) equals C of the target neural layer              |
|                                         | Product of all blocking factors of K (S6) equals K of the target neural layer              |
| Buffer capacity (local)                 | Inputs/weights/outputs sizes (S1-S6) cannot exceed corresponding local sub-buffer capacity |
| Buffer capacity (global)                | Size of all types of data (S1-S6) does not exceed global buffer capacity                   |
| Parallelism                             | Product of blocking factors in global buffer X-axis (S1-S6) cannot exceed # PEs in X-axis  |
|                                         | Product of blocking factors in global buffer (S1-S6) cannot exceed total # PEs             |

Figure 9: Software constraints.

|                              |                   |
|------------------------------|-------------------|
| number of independent trials | 5 (HW), 10 (SW)   |
| number of random data points | 50 (HW), 150 (SW) |
| number of warmup data points | 5 (HW), 30 (SW)   |
| number of samples for EI     | 1000              |
| lambda for LCB               | 1.0               |

Figure 10: Hyperparameters for BO.

## C NEURAL MODEL SPECIFICATIONS.

In Figure 11 and Figure 12 we report the specifications of neural models benchmarked in this paper.

## D PARAMETERIZATION OF 2D CONVOLUTION

Listing 14 gives the seven-level nested loop that comprises a 2D convolution.

Figure 17 shows a design point for the CONV4 layer of ResNet. The architecture components are again the same as in the 1D example, but since the memory footprint is significantly larger, the PE can no longer capture all data reuse, so the Global Buffer must store large portions of the inputs and outputs.

## E EXAMPLE PARAMETER VECTOR

Below are example vectors of hardware and software parameters our BO optimizes.

## F ADDITIONAL RESULTS

### F.1 SOFTWARE OPTIMIZATION

In Figure 18 we show more examples of the software optimization over multiple layers of the different architectures. Our Bayesian optimization formulation consistently outperforms the baselines (Chen et al., 2018).

### F.2 ABLATIONS

In Figure 19 we compare different surrogate models and acquisition functions for Bayesian optimization of the software mapping. We found Gaussian processes with LCB to consistently outperform other alternatives.

| Model  | Layers    | Specifications                                                                                       |
|--------|-----------|------------------------------------------------------------------------------------------------------|
| ResNet | ResNet-K1 | Filter size: 3×3<br>Output size: 56×56<br># input channel: 64<br># output channel: 64<br>Stride: 2   |
|        | ResNet-K2 | Filter size: 3×3<br>Output size: 28×28<br># input channel: 128<br># output channel: 128<br>Stride: 1 |
|        | ResNet-K3 | Filter size: 3×3<br>Output size: 14×14<br># input channel: 256<br># output channel: 256<br>Stride: 1 |
|        | ResNet-K4 | Filter size: 3×3<br>Output size: 7×7<br># input channel: 512<br># output channel: 512<br>Stride: 1   |
| DQN    | DQN-K1    | Filter size: 8×8<br>Output size: 20×20<br># input channel: 4<br># output channel: 16<br>Stride: 4    |
|        | DQN-K2    | Filter size: 4×4<br>Output size: 9×9<br># input channel: 16<br># output channel: 32<br>Stride: 2     |

Figure 11: Specifications of ResNet (ResNet-18) (He et al., 2016) and DQN (Mnih et al., 2013)

In Figure 20 we investigate the robustness of LCB for software optimization using different values of  $\lambda$ . We found that  $\lambda = 0.1$  tends to be too greedy, but that above  $\lambda = 0.5$ , LCB tends to be fairly robust.

| Model       | Layers         | Specifications                                             |
|-------------|----------------|------------------------------------------------------------|
| MLP         | MLP-K1         | $d_{in}: 512$<br>$d_{out}: 512$                            |
|             | MLP-K2         | $d_{in}: 64$<br>$d_{out}: 1024$                            |
| Transformer | Transformer-K1 | $d_{model} = 512$<br>$d_v = 32$<br>$d_k = 32$<br>$h = 16$  |
|             | Transformer-K2 | $d_{model} = 512$<br>$d_v = 64$<br>$d_k = 64$<br>$h = 8$   |
|             | Transformer-K3 | $d_{model} = 512$<br>$d_v = 128$<br>$d_k = 128$<br>$h = 4$ |
|             | Transformer-K4 | $d_{model} = 512$<br>$d_v = 512$<br>$d_k = 512$<br>$h = 1$ |

Figure 12: Specifications of MLP and Transformer (Vaswani et al., 2017)

| Model    | Feature name        | Description                                                             |
|----------|---------------------|-------------------------------------------------------------------------|
| Hardware | mesh_x_ratio        | The ratio of PE array and global buffer along x-axis                    |
|          | mesh_y_ratio        | The ratio of PE array and global buffer along y-axis                    |
| Software | input_buffer_usage  | input data size / input (local) buffer size                             |
|          | weight_buffer_usage | weight data size / input (local) buffer size                            |
|          | output_buffer_usage | output data size / input (local) buffer size                            |
|          | global_buffer_usage | all data size / global buffer size                                      |
|          | parallelism_ratio_x | used parallelism / available parallelism in the x-axis of global buffer |
|          | parallelism_ratio_y | used parallelism / available parallelism in the y-axis of global buffer |

Figure 13: Extra features used by the hardware and software BO optimizers.

```

for n in [0:N)
  for k in [0:K)
    for r in [0:R)
      for s in [0:S)
        for p in [0:P)
          for q in [0:Q)
            for c in [0:C)
              outputs[n][k][q][p] += weights[k][c][s][r] *
                                     inputs[n][c][q+s][p+r]

```

Figure 14: Computing a 2D convolution with a seven-level nested loop.

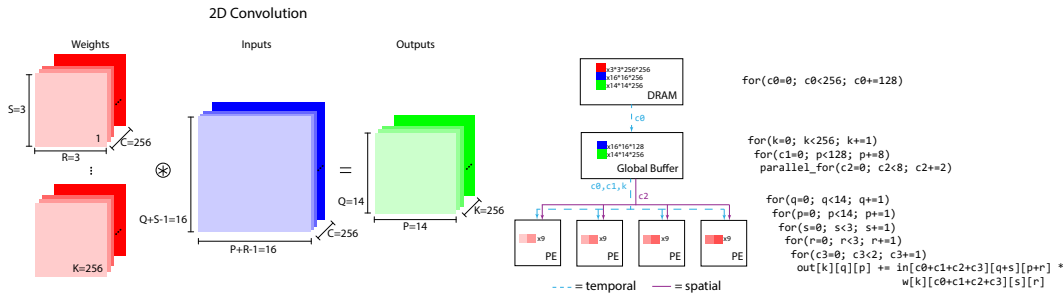

Figure 15: An architecture computing the CONV4 layer of ResNet.

| Index | Type        | Range of Values                 |
|-------|-------------|---------------------------------|
| 1     | int         | Factors of 256                  |
| 2     | int         | Factors of 256                  |
| 3     | int         | 0-220 (total local buffer size) |
| 4     | int         | 0-220 (total local buffer size) |
| 5     | int         | 0-220 (total local buffer size) |
| 6     | int         | Factors of 168                  |
| 7     | int         | Factors of H1                   |
| 8     | int         | Factors of H2                   |
| 9     | int         | Factors of 16                   |
| 10    | int         | Factors of 16                   |
| 11    | categorical | 0, 1                            |
| 12    | categorical | 0, 1                            |

Figure 16: An example vector of hardware parameters. Please refer to Figure 6 for more detailed descriptions.

| Index | Type        | Range of Values |
|-------|-------------|-----------------|
| 1-2   | int         | Factors of 3    |
| 3-4   | int         | Factors of 3    |
| 5-6   | int         | Factors of 28   |
| 7-9   | int         | Factors of 28   |
| 10-12 | int         | Factors of 128  |
| 13-17 | int         | Factors of 128  |
| 18    | categorical | 0-1             |
| 19    | categorical | 0-5             |
| 20    | categorical | 0-1             |
| 21    | categorical | 0-1             |
| 22    | categorical | 0-23            |

Figure 17: An example vector of software parameters (with ResNet-K2). Please refer to Figure 8 for more detailed descriptions. In this example, parameters 1-17 correspond row-wise to S1-S6 respectively, parameters 18-20 correspond to S7, and parameters 21 and 22 correspond to S8 and S9 respectively.

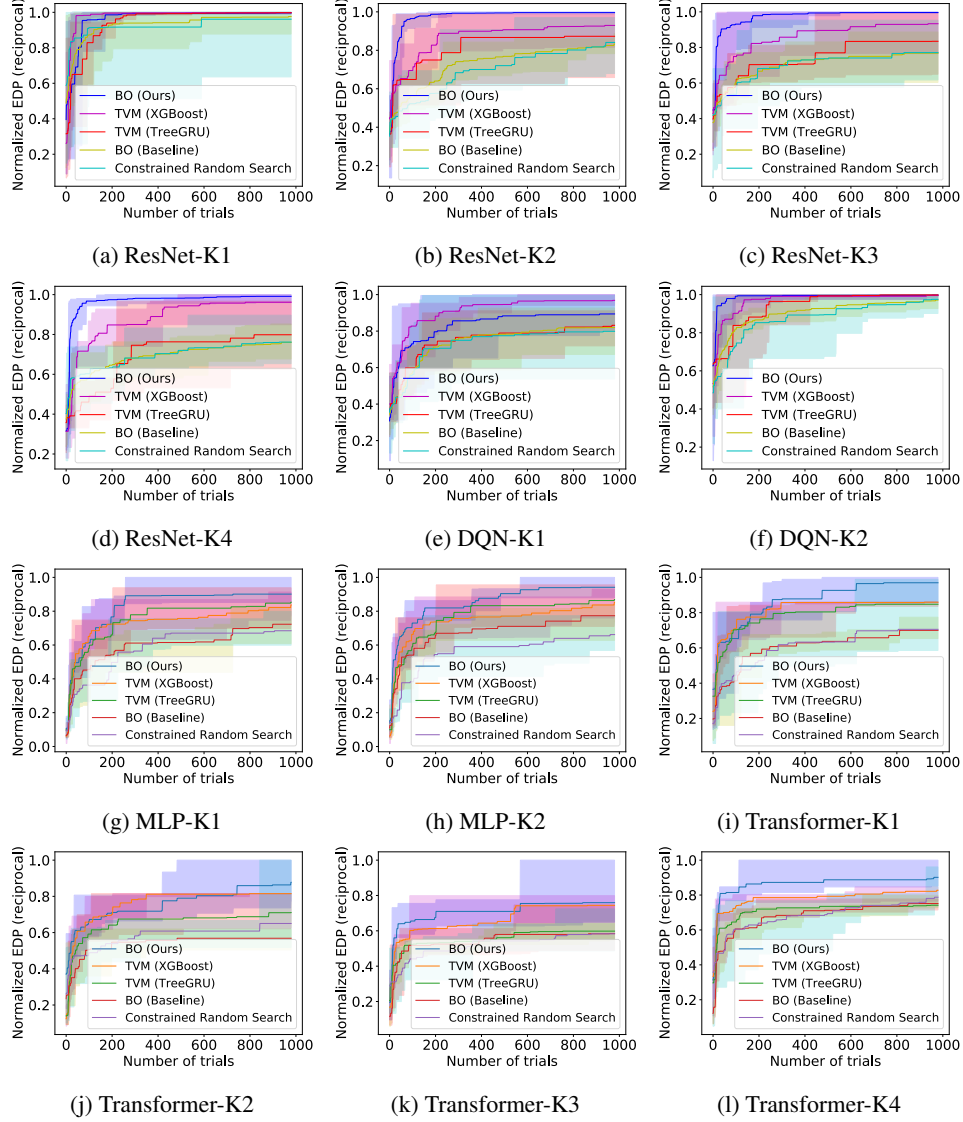

Figure 18: Software mapping optimization on ResNet, DQN, MLP, and Transformer. The Y-axis shows the reciprocal of energy-delay product (EDP) (normalized against the best EDP value). Higher is better.

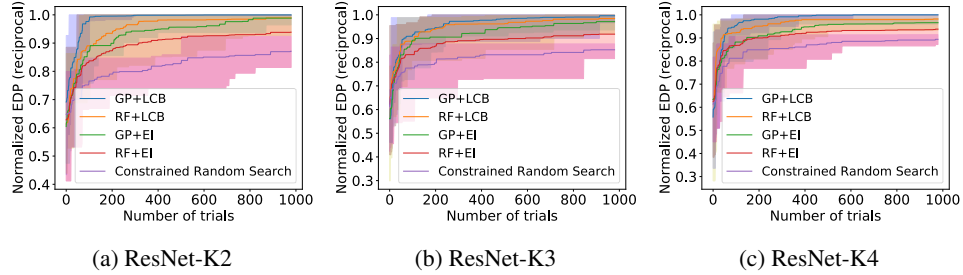

Figure 19: GP with different surrogate models and acquisition functions.

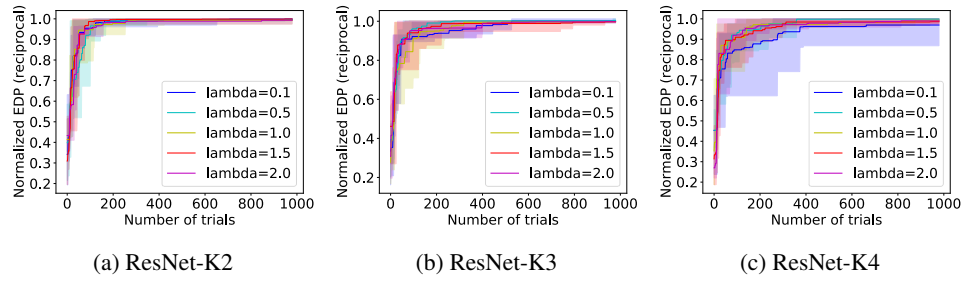

Figure 20: LCB acquisition function with different lambda values.
